# Supplementary material for: Insufficiently complex unique-molecular identifiers (UMIs) distort small RNA sequencing
Source: PubMed Central journal article supplement (PMC7471316; doi:10.1038/s41598-020-71323-0), 2020-09-03
Supplement: 41598_2020_71323_MOESM1_ESM.pdf [file 41598_2020_71323_MOESM1_ESM.pdf]

## **SUPPLEMENTARY INFORMATION**

### **Insufficiently complex Unique-Molecular Identifiers (UMIs) distort small RNA sequencing**

Klay Saunders<sup>1</sup>; Andrew G Bert<sup>1</sup>; Kate B Dredge<sup>1</sup>; John Toubia<sup>1</sup>; Philip A Gregory<sup>1,2</sup>; Katherine A Pillman<sup>1</sup>; Greg J Goodall<sup>1,2</sup> and Cameron P Bracken<sup>1,2</sup>

<sup>1</sup>Centre for Cancer Biology, University of South Australia and SA Pathology, Adelaide, SA, Australia

<sup>2</sup>Discipline of Medicine, The University of Adelaide, Adelaide, SA, Australia

### **Supplementary Figure 1 – Highly expressed microRNAs are subject to over de-duplication**

As with Figure 1, miRNAs (represented as dots) from smRNA libraries are plotted on axes of total RNA reads (x axis) and de-duplicated read counts (y axis). 6 samples in total (2 HMLE, 4 MesHMLE) were assessed. Each sample is paired (total RNA Seq on top and AGO IP below). Hamming distance = 1 and = 0 are represented in Supplementary Figures 1a and 1b respectively.

### **Supplementary Figure 2 – MicroRNA reads are not subject to over de-duplication when a longer (12nt) UMI is utilised**

MicroRNAs were sequenced using a QIAseq miRNA library kit that employs a 12nt UMI length. Hamming distances = 1 and = 0 are shown on top and below respectively. Data taken from Wong et al (26).

### **Supplementary Table 1 – Read sequencing and mapping numbers for each library from Supplementary Figure 1**

# Supplementary Figure 1a

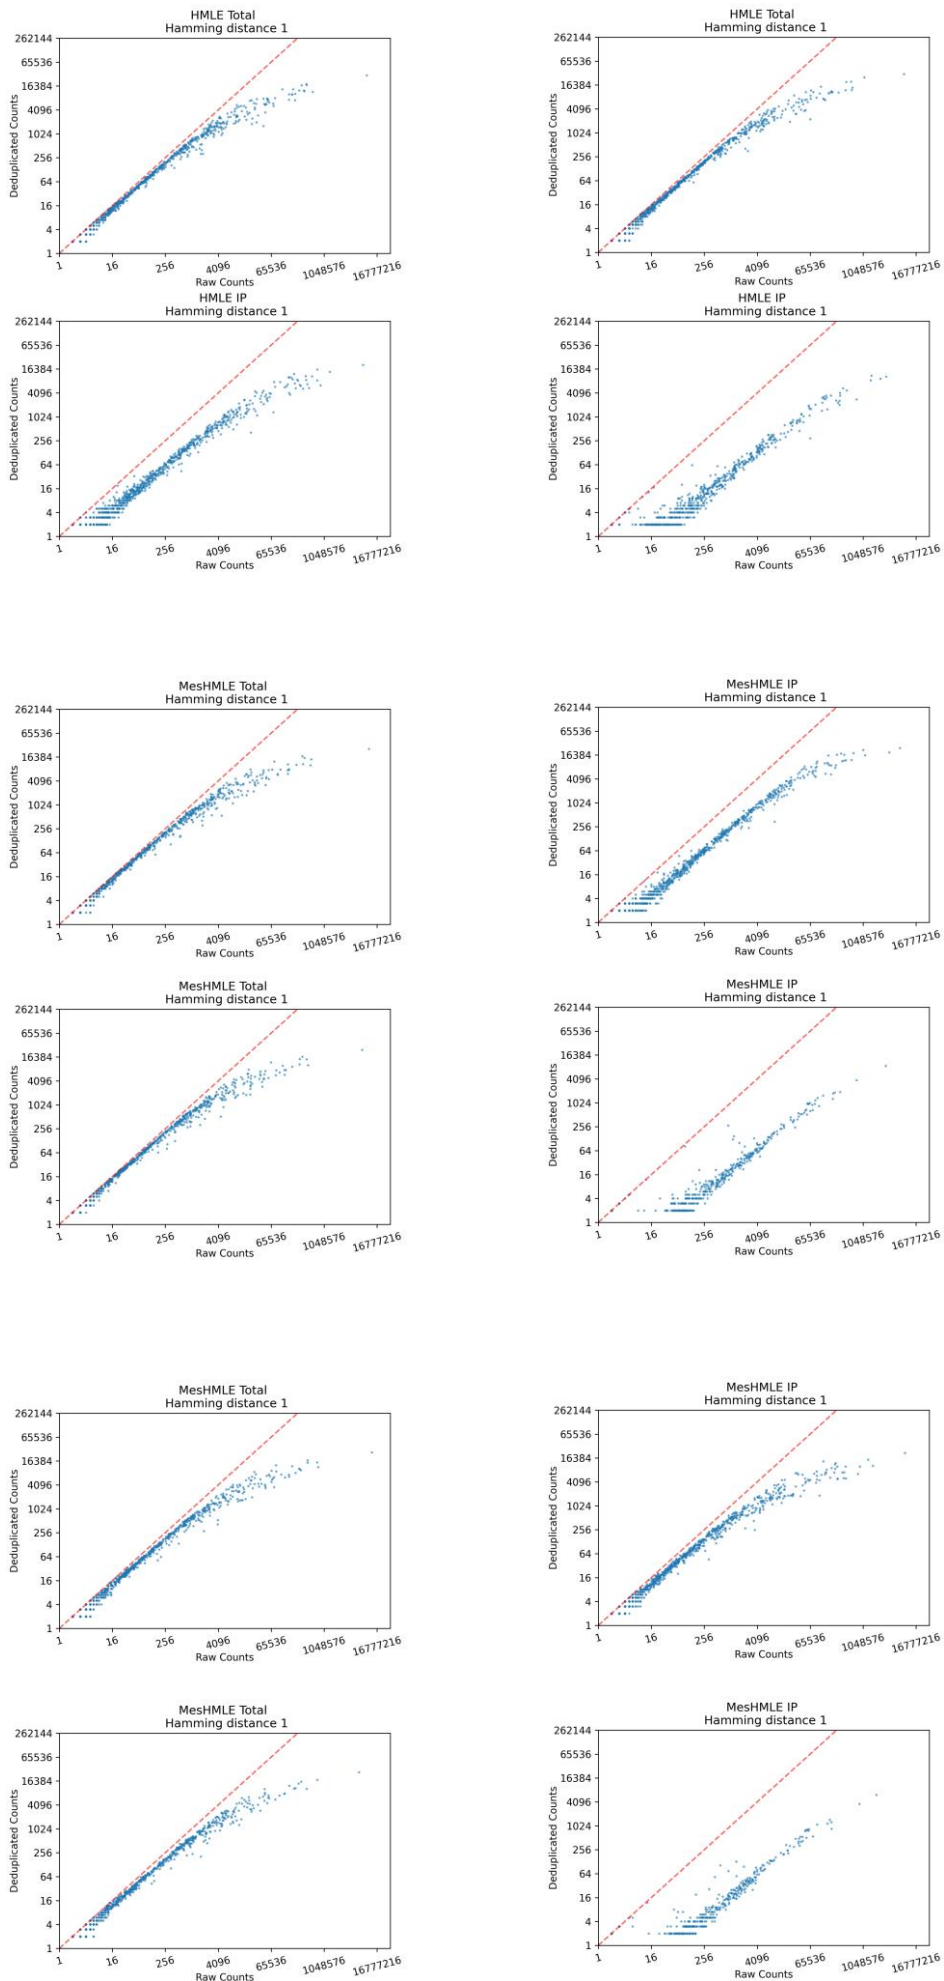

# Supplementary Figure 1b

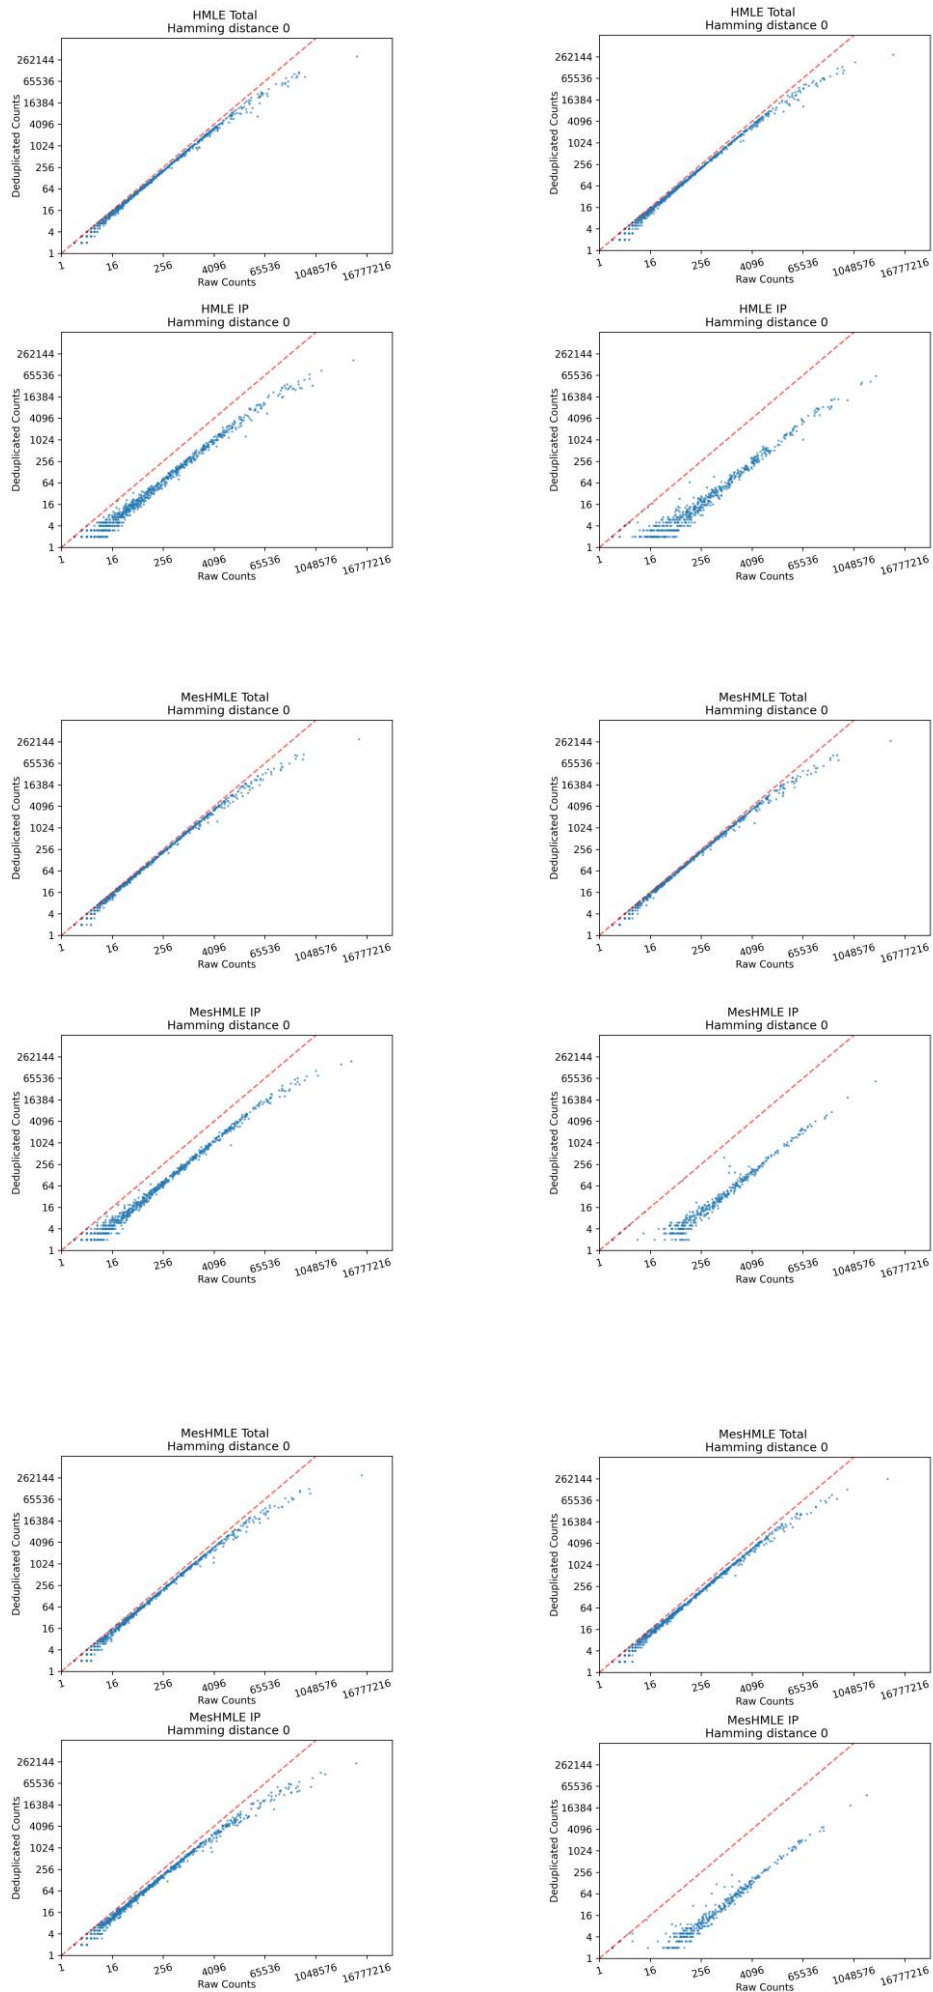

# Supplementary Figure 2

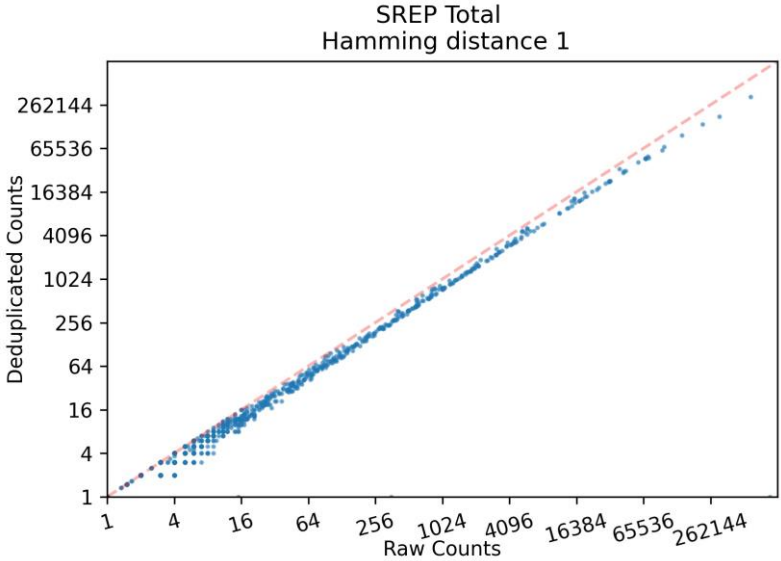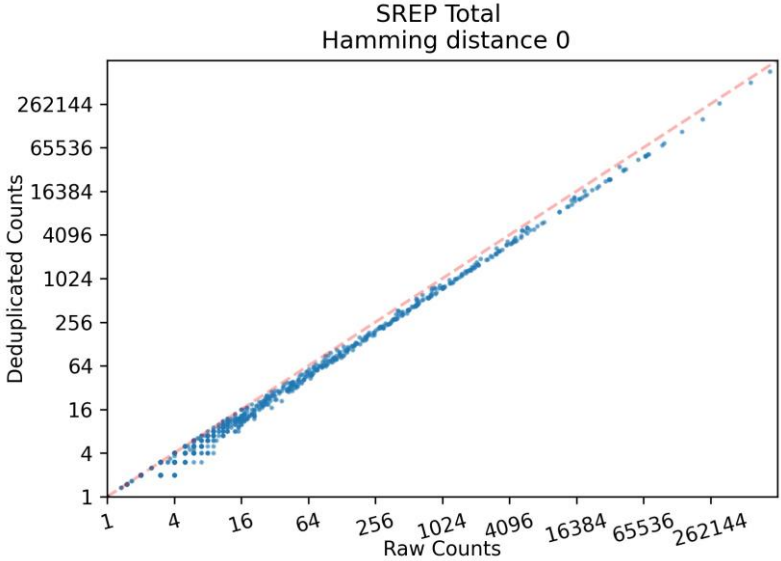

# Supplementary Table 1

| Sample | Total sequences | Mapped     | % mapped | UMI dedup (ed=0) |            |        | UMI dedup (ed=1) |            |        |
|--------|-----------------|------------|----------|------------------|------------|--------|------------------|------------|--------|
|        |                 |            |          | Deduped          | # lost     | % lost | Deduped          | # lost     | % lost |
| H1     | 23,307,989      | 22,911,560 | 98.30%   | 2,208,585        | 28,389,113 | 92.78% | 610,065          | 29,987,633 | 98.01% |
| H1_IP  | 31,103,367      | 30,597,698 | 98.37%   | 5,935,489        | 16,976,072 | 74.09% | 2,607,465        | 20,304,096 | 88.62% |
| H5     | 31,016,453      | 29,993,663 | 96.70%   | 1,227,002        | 24,573,240 | 95.24% | 559,215          | 25,241,027 | 97.83% |
| H5_IP  | 26,694,707      | 25,800,242 | 96.65%   | 10,848,489       | 19,145,176 | 63.83% | 5,653,782        | 24,339,883 | 81.15% |
| M2     | 21,775,030      | 21,293,910 | 97.79%   | 3,405,022        | 29,690,097 | 89.71% | 1,194,899        | 31,900,220 | 96.39% |
| M2_IP  | 33,472,271      | 33,095,119 | 98.87%   | 4,404,438        | 16,889,472 | 79.32% | 1,613,619        | 19,680,291 | 92.42% |
| M3     | 16,630,539      | 16,294,053 | 97.98%   | 640,552          | 11,675,484 | 94.80% | 376,281          | 11,939,755 | 96.94% |
| M3_IP  | 13,086,696      | 12,316,036 | 94.11%   | 3,865,215        | 12,428,838 | 76.28% | 1,369,609        | 14,924,444 | 91.59% |
| M4     | 25,550,111      | 25,173,554 | 98.53%   | 3,014,270        | 29,263,430 | 90.66% | 631,894          | 31,645,806 | 98.04% |
| M4_IP  | 32,595,664      | 32,277,700 | 99.02%   | 4,354,658        | 20,818,896 | 82.70% | 1,519,713        | 23,653,841 | 93.96% |
| M5     | 14,759,855      | 14,523,946 | 98.40%   | 368,943          | 8,033,036  | 95.61% | 203,268          | 8,198,711  | 97.58% |
| M5_IP  | 8,701,266       | 8,401,979  | 96.56%   | 3,025,323        | 11,498,623 | 79.17% | 1,100,216        | 13,423,730 | 92.42% |
